# Supplementary material
Source: Research Square preprint supplement (doi:10.21203/rs.3.rs-9624193/v1)

**Graphical abstract:**

**
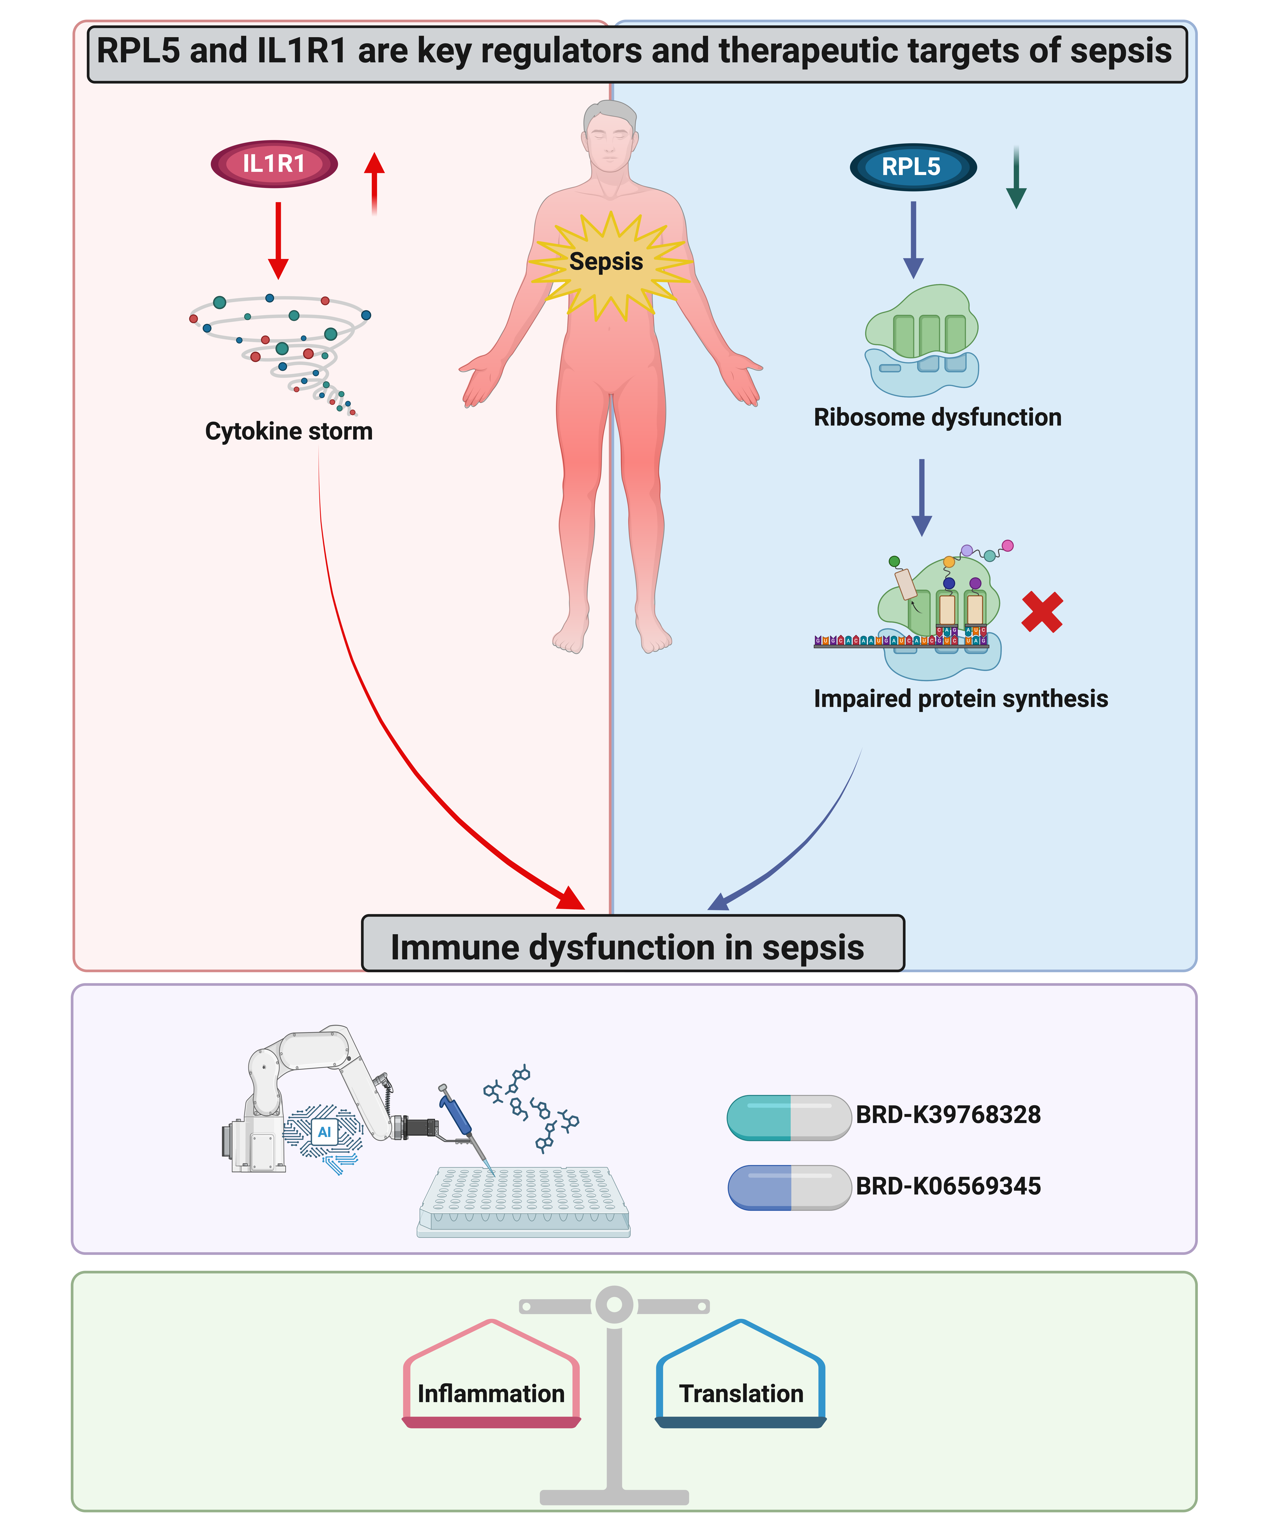
**

Supplement: Supplementary file 2 [file ce787f469033423b982ece12.docx]
